# Supplementary material
Source: PubMed Central journal article supplement (PMC7585036)
Supplement: jama-e2018618-s003.pdf [file jama-e2018618-s003.pdf]

## Supplementary Online Content 3

Zarbock A, Küllmar M, Kindgen-Milles D, et al; RICH Investigators and the Sepnet Trial Group. Effect of regional citrate anticoagulation vs systemic heparin anticoagulation during continuous kidney replacement therapy on dialysis filter life span and mortality among critically ill patients with acute kidney injury: a randomized clinical trial. *JAMA*. doi:10.1001/jama.2020.18618

### eMethods

### eResults

**eFigure 1.** Hemoglobin Values at Different Time Points

**eFigure 2.** SOFA Scores at Different Time Points

**eFigure 3.** Magnesium Levels at Different Time Points

**eTable 1.** Protocol Changes After Amendment

**eTable 2.** Additional Inclusion Criteria for Dialysis Initiation

**eTable 3.** Characteristics of Kidney Replacement Therapy

**eTable 4.** Characteristics of the Catheters Used for Kidney Replacement Therapy

**eTable 5.** Fluid Balance at Different Days

**eTable 6.** Further Dialysis and Kidney Associated Outcomes

**eTable 7.** Details on Infections

**eTable 8.** Subgroup Analysis Surgical vs. Non-surgical Patients

**eTable 9.** Adverse Events in Surgical Events

**eTable 10.** Adverse Events in Non-surgical Events

### eReferences

This supplementary material has been provided by the authors to give readers additional information about their work.

# **Effect of Regional Citrate Anticoagulation vs Systemic Heparin Anticoagulation During Continuous Kidney Replacement Therapy on Dialysis Filter Lifespan and Mortality Among Critically Ill Patients with Acute Kidney Injury: A Randomized Clinical Trial**

The RICH Investigators

## **Table of contents**

| <b>Content</b>                                                                 | <b>Page</b> |
|--------------------------------------------------------------------------------|-------------|
| eMethods                                                                       | 2           |
| eResults                                                                       | 5           |
| eFigures                                                                       | 7           |
| eFigure 1. Hemoglobin Values at Different Time Points                          | 7           |
| eFigure 2. SOFA Scores at Different Time Points                                | 8           |
| eFigure 3. Magnesium Levels at Different Time Points                           | 9           |
| eTables                                                                        | 10          |
| eTable 1. Protocol Changes After Amendment                                     | 10          |
| eTable 2. Additional Inclusion Criteria for Dialysis Initiation                | 12          |
| eTable 3. Characteristics of Kidney Replacement Therapy                        | 13          |
| eTable 4. Characteristics of the Catheters Used for Kidney Replacement Therapy | 15          |
| eTable 5. Fluid Balance at Different Days                                      | 16          |
| eTable 6. Further Dialysis and Kidney Associated Outcomes                      | 17          |
| eTable 7. Details on Infections                                                | 20          |
| eTable 8. Subgroup Analysis Surgical vs. Non-surgical Patients                 | 21          |
| eTable 9. Adverse Events in Surgical Events                                    | 26          |
| eTable 10. Adverse Events in Non-surgical Events                               | 27          |
| eReferences                                                                    | 28          |

## Supplementary Methods

### Inclusion of unconscious patients

According to the European regulation and the requirements of the institutional review boards for including unconscious patients into trials, patients can be included into trials if there is no indication that the patient was unwilling to participate in clinical trials. This has to be evaluated by telephone calls to the family members, close relatives or the general practitioner who knows the patient personally. In this case, the patient has to be asked for consent as soon as he/she regains consciousness but at the latest two weeks after inclusion into the trial. If it is foreseeable that the patient does not regain consciousness, a guardianship procedure has to be initiated and the guardianship needs to provide consent for the patient to participate in the trial. Reasons for including but not analyzing patients were: refusal of the guardianship procedure by the local court, no written consent of guardian prior to the death of the patient, no written consent of the guardian at all, or timeline of two weeks not fulfilled.

### Randomization

Randomization was performed centrally by the Clinical Trials Centre Leipzig in a 1:1 proportion. A computerized minimization method with random component was used that provided treatment assignment to be balanced by the factors study center, sex, cardiovascular sequential organ failure assessment (SOFA) score (0-2 versus 3-4) and by the presence or absence of oliguria.

Pocock's minimization method is a method of stratified randomization that leads to balanced marginal treatment totals for each stratification factor.<sup>1</sup> After each recruited patient the allocation ratio of the next patient is adjusted continually based on the up-to-date marginal distribution of stratification factors and the new patient's expression of his/her stratification factors. Instead of a 1:1 allocation ratio, the allocation ratio is shifted so that after inclusion of the new patient the chance of more balanced marginal totals of stratification factors is increased. The random component refers to the fact that the shift of the allocation ratio is never carried so far that it results in the deterministic assignment of a treatment. Instead of that in case of all recruited patients there is an (uneven but still >0) chance to receive each of the two treatments.

### Procedures

Participating centers utilized the standard dialysis machines used in daily clinical care (Fresenius, Baxter, BBraun) and adapted the mode of dialysis according to the patients' condition. 22 centers used Fresenius Medical Care machines (with 4% sodium citrate, K2 or K4 as dialysate, and Multibic as substitution fluid where applicable), 3 centers used Prismaflex by Baxter (Prismocitrate 10/2 or 18/0, Prismocal and Phoxilium), 1 center used BBraun machines (with 30% sodium citrate, HDE 2/0 as dialysate, and sodium chloride as substitution fluid where applicable). Modality of continuous kidney replacement therapy was described using machine-centric terminology. All participating centers used published citrate protocols.<sup>2,3</sup> To prevent thromboembolic complications, prophylactic heparin anticoagulation was permitted in the regional citrate anticoagulation group.<sup>4</sup>

### Further outcomes

Chronic kidney disease and new onset of chronic kidney disease were exploratory outcomes. Chronic kidney disease was defined according to the estimated GFR criterion of the KDIGO recommendations for chronic kidney disease in all patients using the Chronic Kidney Disease Epidemiology Collaboration formula at day 90 and 1 year.<sup>5</sup> New onset of chronic kidney disease was defined as an estimated GFR <60ml/min/1.73m<sup>2</sup> in patients without prior chronic kidney disease.

## Stopping rules

Regarding the first co-primary outcome of filter lifespan, there was no specified stopping rule for futility. Regarding the second co-primary outcome of 90-day mortality, a non-binding stopping rule for futility was specified. The sample size was limited to a maximal total number of 1450 patients. In the interim analysis it was determined if the (unadjusted) p-value of favorable survival in the citrate group is 0.5 or larger, and if stochastic curtailment shows a conditional power of the final statistical analysis with 1450 patients that is lower than 50%. Both above stopping criteria may lead to the decision to stop recruitment, but were not strictly binding. The final decision to stop or continue recruitment was drawn by the principal investigator based on the recommendation of the data and safety monitoring board.

## Interim analysis

The interim analysis included 470 patients who were recruited up to the cutoff date June 30, 2018 (235 patients in the regional citrate group and the systemic heparin group, respectively), and was conducted at the time when primary outcome data of all recruited patients were available. The study statistician (JG) performed the interim analysis and delivered the results to the data and safety monitoring board confidentially.

In total, 1680 filters were used (n=749 in the citrate and n=931 in the heparin group). Filter lifespan was significantly longer in the citrate as compared to the heparin group (48h [IQR: 20h, 71h] vs. 27h [IQR: 13h, 53h];  $P < 0.001$ ). 90-day all-cause mortality was 51.4% in the citrate and 54.6% in the systemic heparin group (one-sided  $P = 0.17$ ). The calculated (one-sided) conditional error function was  $\alpha(P) = 0.033$  (inverse normal method). Based on the observed difference of 3.2 percentage points the calculated number of additional patients for a required 70% conditional power of the final statistical analysis was 2754. According to the study protocol, the maximal total number of recruited patients was n=1450. With a number of 1450 patients included in the final statistical analysis, the calculated conditional power was 33.4%.

In the light of the results from the interim analysis, the preplanned end of the trial according to the protocol was reached and the data and safety monitoring board deemed that completion of enrollment was unlikely to change the results of the trial significantly and recommended that the trial be stopped. The recommendation was followed and recruitment was stopped by the principal investigator at the 4th of January 2019 for two reasons: regarding the first co-primary endpoint filter lifespan, significant superiority of regional citrate over systemic heparin anticoagulation was proven; and regarding the second co-primary endpoint overall survival in a 90-day follow-up period, the calculated conditional power of a final statistical analysis with 1450 patients was  $33.4\% < 50\%$ , so that the preplanned stopping criterion was reached.

After patient no. 470 was recruited and before the decision to stop recruitment could be drawn, recruitment was carried on until patient no. 470 completed the 90-day follow-up period. In the meantime, additional patients were recruited up to the 3<sup>rd</sup> of January 2019. After the additional patients completed the 90-day follow-up period, the final analysis was conducted, including 638 recruited patients in total (596 evaluable patients). The results of the final analysis are reported in the main body of the manuscript.

## Post-hoc Statistical analyses

In post-hoc sensitivity analyses beyond the primary statistical analysis, 90-day overall survival was evaluated with additional adjustment for the patients' baseline fluid balance as well as the time-dependent factor new infection since start of dialysis using multivariable Cox regression. In a further post-hoc sensitivity analysis filter lifespan was evaluated with censoring at 72 hours using survival analytic methods, in order to account for the obligatory filter

change after 72 hours (manufactures recommend to change the filter after 72 hours and most of the centers generally view this as completion of a filters lifespan). A pre-planned subgroup analysis of surgical and non-surgical patients was conducted by including an interaction effect of the randomized treatment and the subgroup indicator in the respective multivariable models. Statistical tests for significant interaction were performed and differences in the treatment effect size among subgroups were quantified based on the estimated interaction effect. The impact of filter lifespan on the occurrence of infections was evaluated by multivariable logistic regression with the factors anticoagulation strategy, study center, baseline cardiovascular SOFA Score, presence or absence of oliguria, sex, pre/post amendment 1, and aggregated filter lifespan.

Further statistical analyses were performed using descriptive and inferential statistical methods, including pre-specified secondary endpoints, subgroup analyses, safety analyses, and additional exploratory analyses. The results of all secondary analyses were considered exploratory. P-values were regarded significant in case  $p \leq 0.05$  without adjustment for multiplicity. Categorical variables were compared with the use of the chi-square test, and continuous variables were compared with the use of Student's t-Test or Wilcoxon test, as appropriate. Results are generally reported by mean parameter estimates and associated 95% CIs. For non-normal data the absolute difference between groups was reported using the Hodges-Lehmann estimator of location shift. All applied hypothesis tests were two-sided unless otherwise stated.

## Supplementary Results

### Model diagnostics of the linear mixed model of filter lifespan

The basic model assumptions of the linear mixed model are the normality and constant variance of the random effect and the random error term. Model diagnostics were performed using the Studentized conditional residuals. Histograms, normal q-q plots, and residual versus predicted plots revealed that the basic model assumptions were met.

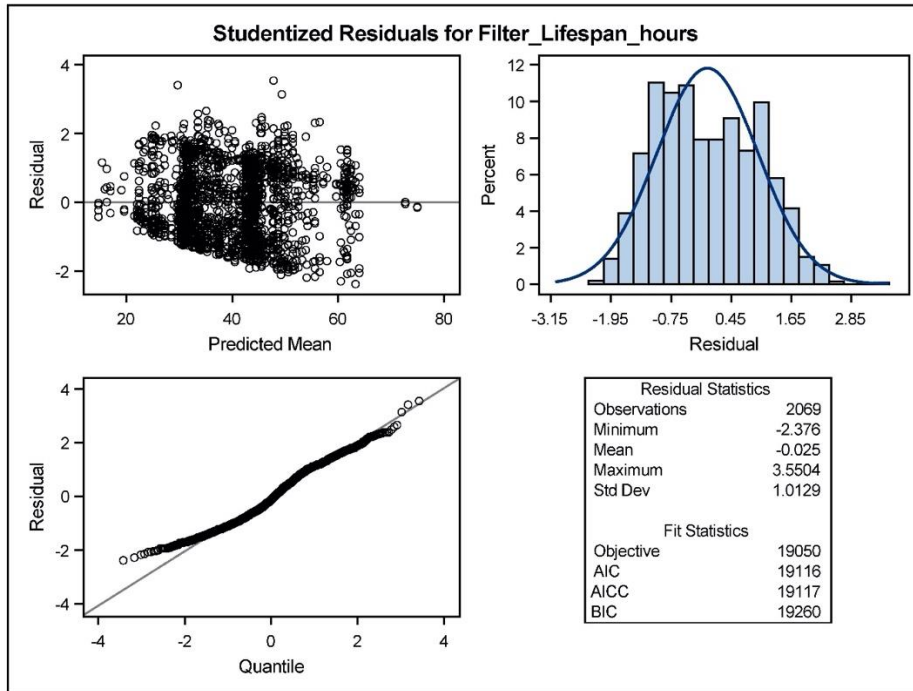

### Model diagnostics of the Cox regression of 90-day mortality

The proportionality assumption was tested and confirmed based on the Schoenfeld residuals using the Grambsch-Therneau method.

|                                               | Chi-Square | Degrees of freedom | p-value (Grambsch-Therneau test) |
|-----------------------------------------------|------------|--------------------|----------------------------------|
| anticoagulation strategy                      | 1.0657     | 1                  | 0.302                            |
| study center                                  | 35.7837    | 25                 | 0.075                            |
| sex                                           | 0.1337     | 1                  | 0.715                            |
| cardiovascular SOFA score<br>(0-2 versus 3-4) | 0.0291     | 1                  | 0.865                            |
| presence or absence of oliguria               | 0.3879     | 1                  | 0.533                            |
| pre/post amendment 1                          | 0.8211     | 1                  | 0.365                            |
| GLOBAL                                        | 38.2092    | 30                 | 0.144                            |

### **Sensitivity analysis for partial unbalance of randomized treatment groups**

Filter lifespan (adjusted for the factors study center, cardiovascular SOFA score, presence or absence of oliguria, sex, pre/post amendment 1, diabetes and chronic kidney disease) remained significantly longer in the citrate group ( $P<0.001$ ). In the multivariable model neither diabetes nor chronic kidney disease reached significance ( $P=0.079$  and  $P=0.664$ , respectively).

Mortality at day 90 (adjusted for the factors study center, cardiovascular SOFA score, presence or absence of oliguria, sex, pre/post amendment 1, diabetes and chronic kidney disease) was still not significantly different in both randomized treatment groups (HR, 0.87 (95% CI, 0.60 to 1.10);  $P=0.247$ ). In the multivariable model neither diabetes nor chronic kidney disease reached significance ( $P=0.697$  and  $P=0.561$ , respectively).

In terms of the secondary outcomes, it was concluded that the significant differences in new onset of CKD and persistent kidney dysfunction at day 90 emerged by chance, as these results are only detectable at day 90 and not at other time points. Therefore it was not put emphasis on these findings.

### **Sensitivity analysis adjusting for modality of kidney replacement therapy**

Filter lifespan (adjusted for the factors anticoagulation strategy, study center, cardio-vascular SOFA score, presence or absence of oliguria, sex, pre/post amendment 1, CKRT modality) was still significantly longer in the citrate group than in the heparin group (Mean difference = 10.58 (95%CI 7.76-13.40);  $P<0.001$ ). In the multivariable model CKRT modality showed a significant effect on filter lifespan ( $P=0.002$ ). In pairwise comparisons of modalities, it was found that CVVHD had the longest filter lifespan, followed by CVVHDF and CVVH.

CVVHD versus CVVH: Mean difference = 14.68 (95%CI 5.71-23.65),  $P=0.001$

CVVHDF versus CVVH: Mean difference = 9.54 (95%CI 0.23-18.85),  $P=0.045$

CVVHD versus CVVHDF: Mean difference = 5.14 (95%CI 0.23-10.05),  $P=0.040$

In terms of 90-day mortality, CKRT modality had no impact. 90-day Mortality, adjusted for the factors anticoagulation strategy, study center, base-line cardiovascular SOFA Score, presence or absence of oliguria, sex, pre/post amendment 1, CKRT modality:

RCA versus SHA: Hazard Ratio HR=0.90 (95%CI 0.70-1.16),  $P=0.434$

CKRT modality (CVVH versus CVVHD versus CVVHDF):  $P=0.141$

## Supplementary Figures

eFigure 1: Hemoglobin values at different time points

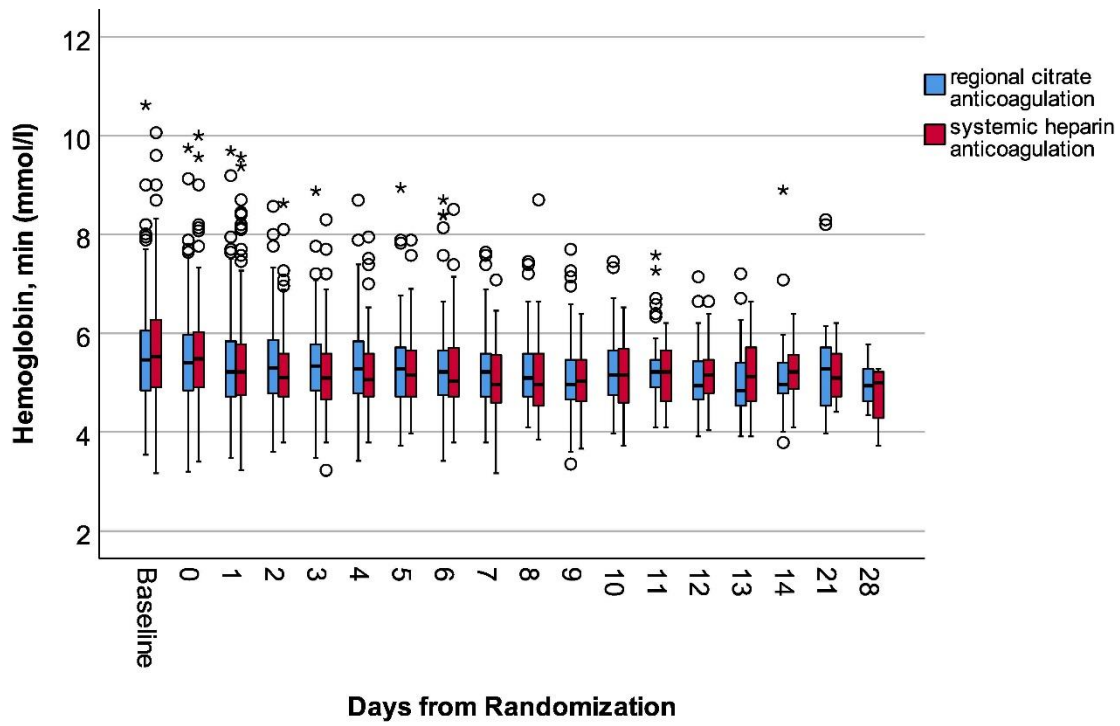



**eFigure 2: SOFA Score at different time points**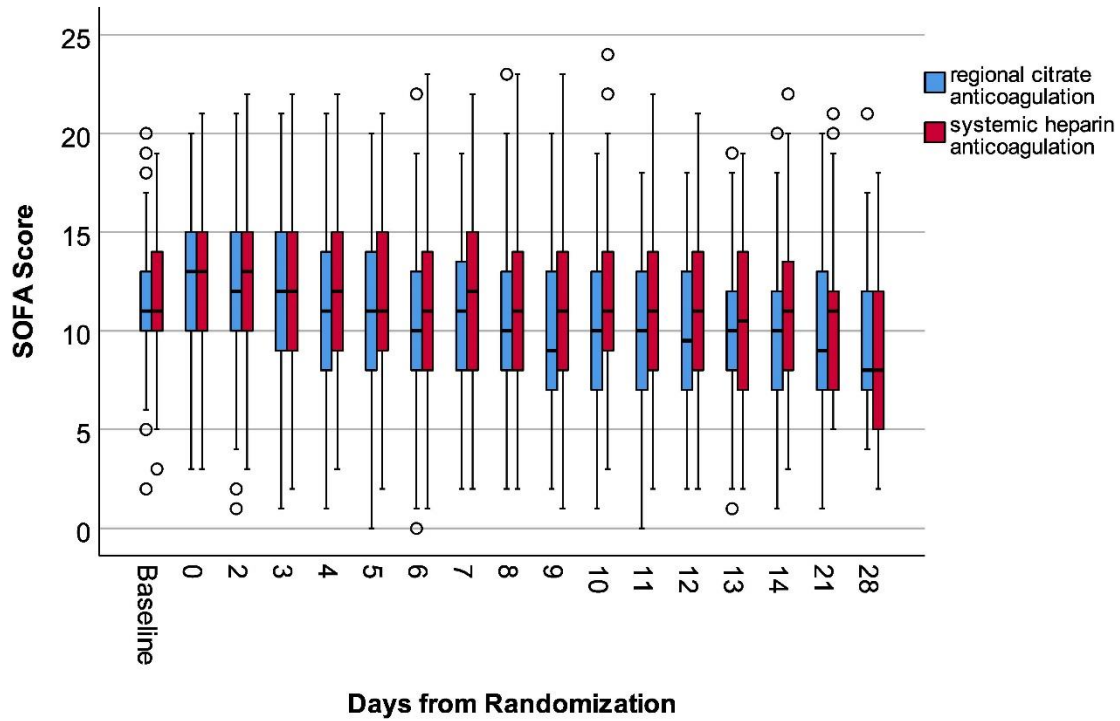

SOFA is a score that evaluates the degree of organ dysfunction and helps determine the mortality risk of a patient. SOFA score values range from 0 to 24 with higher values indicating highest risk of mortality (SOFA 10-11: 50% mortality)

eFigure 3: Magnesium levels at different time points

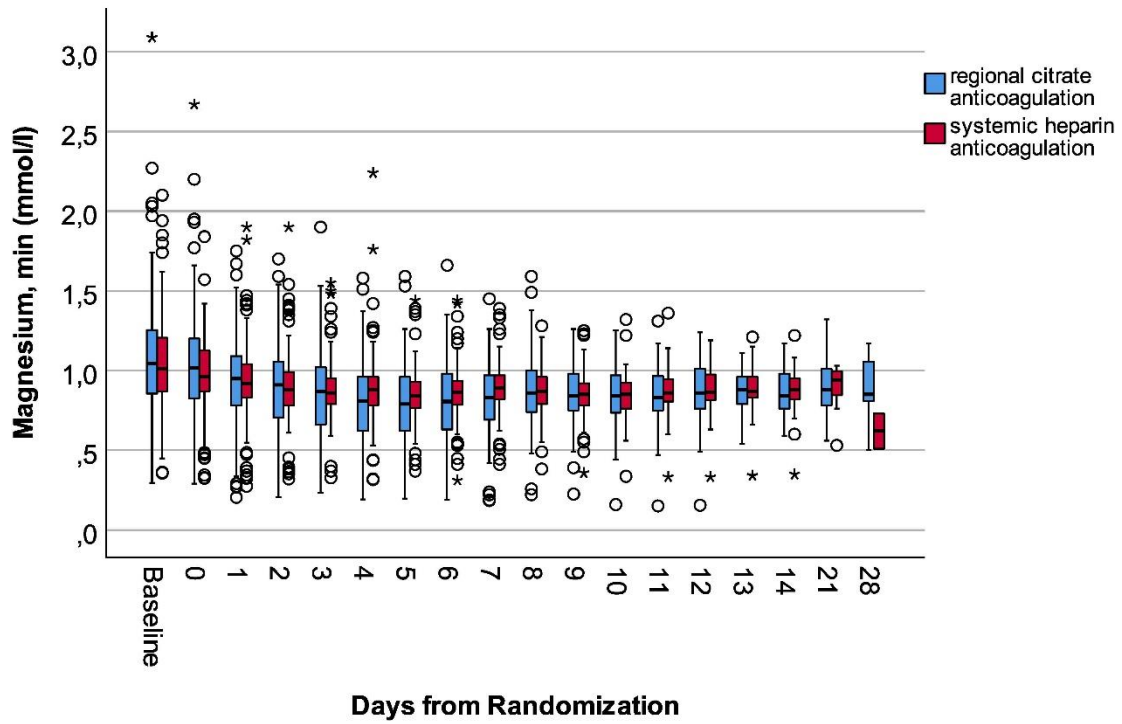

## Supplementary Tables

| <b>eTable 1: Protocol changes after amendment</b>                                                                                                                                                                                                                                                                                                                                                                                                                                                                                                           |                                                                                                                                                                                                                                                                                                                                                                                                                                                                                                                                                        |
|-------------------------------------------------------------------------------------------------------------------------------------------------------------------------------------------------------------------------------------------------------------------------------------------------------------------------------------------------------------------------------------------------------------------------------------------------------------------------------------------------------------------------------------------------------------|--------------------------------------------------------------------------------------------------------------------------------------------------------------------------------------------------------------------------------------------------------------------------------------------------------------------------------------------------------------------------------------------------------------------------------------------------------------------------------------------------------------------------------------------------------|
| <b>Old version</b>                                                                                                                                                                                                                                                                                                                                                                                                                                                                                                                                          | <b>New version</b>                                                                                                                                                                                                                                                                                                                                                                                                                                                                                                                                     |
| Patients with increased bleeding risk (e.g. an active bleeding from ulcers in the gastro-intestinal tract, hypertension with a diastolic blood pressure higher than 105 mm Hg, injuries (intracranial haemorrhage, aneurysm of brain arteries) of or surgical procedures on the central nervous system if a heparinization with a target aPTT 45-60 s is not allowed by the treating neurologist or neurosurgeon, severe retinopathies, bleeding into the vitreum, ophthalmic surgical procedures or injuries, active tuberculosis; infective endocarditis) | Patients with increased bleeding risk (e.g. active bleeding from ulcers in the gastro-intestinal tract, hypertension with a diastolic blood pressure higher than 105 mmHg, injuries (intracranial haemorrhage, aneurysm of brain arteries) of or surgical procedures on the central nervous system if a heparinization with a target PTT 45-60 s is not allowed by the treating neurologist or neurosurgeon, severe retinopathies, bleeding into the vitreum, ophthalmic surgical procedures or injuries, active tuberculosis, infective endocarditis) |
| Diseases or organ damage related with haemorrhagic diathesis (coagulopathy, thrombocytopenia, severe liver or pancreas disease)                                                                                                                                                                                                                                                                                                                                                                                                                             | Diseases or organ damage related with haemorrhagic diathesis (coagulopathy, thrombocytopenia, severe liver or pancreas disease)                                                                                                                                                                                                                                                                                                                                                                                                                        |
| Pre-existing kidney disease KDOQI IV not requiring RRT (GFR < 30 mL/min)                                                                                                                                                                                                                                                                                                                                                                                                                                                                                    | Removed.                                                                                                                                                                                                                                                                                                                                                                                                                                                                                                                                               |
| Previous renal-replacement therapy due to acute kidney injury in the last 90 days                                                                                                                                                                                                                                                                                                                                                                                                                                                                           | Removed.                                                                                                                                                                                                                                                                                                                                                                                                                                                                                                                                               |
| Dialysis-dependent chronic kidney insufficiency                                                                                                                                                                                                                                                                                                                                                                                                                                                                                                             | Dialysis-dependent chronic kidney insufficiency                                                                                                                                                                                                                                                                                                                                                                                                                                                                                                        |
| Need of therapeutic systemic anticoagulation                                                                                                                                                                                                                                                                                                                                                                                                                                                                                                                | Need of therapeutic anticoagulation (PTT > 60 s)                                                                                                                                                                                                                                                                                                                                                                                                                                                                                                       |
| Allergic reaction to one of the anticoagulants or ingredients, Heparin-induced thrombocytopenia                                                                                                                                                                                                                                                                                                                                                                                                                                                             | Allergic reaction to one of the anticoagulants or ingredients, Heparin-induced thrombocytopenia                                                                                                                                                                                                                                                                                                                                                                                                                                                        |
| AKI caused by permanent occlusion or surgical lesion of the renal artery                                                                                                                                                                                                                                                                                                                                                                                                                                                                                    | AKI caused by permanent occlusion or surgical lesion of <u>both</u> renal arteries                                                                                                                                                                                                                                                                                                                                                                                                                                                                     |
| AKI caused by (glomerulo-)nephritis, interstitial nephritis, vasculitis or postrenal obstruction                                                                                                                                                                                                                                                                                                                                                                                                                                                            | AKI caused by (glomerulo-)nephritis, interstitial nephritis, vasculitis or postrenal obstruction                                                                                                                                                                                                                                                                                                                                                                                                                                                       |
| Do-not-resuscitate order                                                                                                                                                                                                                                                                                                                                                                                                                                                                                                                                    | Do-not-resuscitate order                                                                                                                                                                                                                                                                                                                                                                                                                                                                                                                               |
| Hemolytic-uremic syndrome/thrombotic thrombocytopenic purpura                                                                                                                                                                                                                                                                                                                                                                                                                                                                                               | Hemolytic-uremic syndrome/thrombotic thrombocytopenic purpura                                                                                                                                                                                                                                                                                                                                                                                                                                                                                          |
| Persistent and severe lactate acidosis in the context of an acute liver failure and/or shock                                                                                                                                                                                                                                                                                                                                                                                                                                                                | Persistent and severe lactate acidosis in the context of an acute liver failure and/or shock                                                                                                                                                                                                                                                                                                                                                                                                                                                           |

|                                                                                                    |                                                                                                    |
|----------------------------------------------------------------------------------------------------|----------------------------------------------------------------------------------------------------|
| Kidney transplant within the last 12 months                                                        | Kidney transplant within the last 12 months                                                        |
| Pregnancy and nursing period                                                                       | Pregnancy and nursing period                                                                       |
| Abortus imminens                                                                                   | Abortus imminens                                                                                   |
| No hemofiltration machine free for use at the moment of inclusion                                  | No hemofiltration machine free for use at the moment of inclusion                                  |
| Participation in another clinical intervention trial in the last 3 months                          | Participation in another clinical intervention trial in the last 3 months                          |
| Persons with any kind of dependency on the investigator or employed by the sponsor or investigator | Persons with any kind of dependency on the investigator or employed by the sponsor or investigator |
| Persons held in an institution by legal or official order                                          | Persons held in an institution by legal or official order                                          |

This amendment was compiled with the steering committee due to the slow recruitment process mainly caused by the two exclusion criteria previous kidney replacement therapy due to acute kidney injury within the last 90 days and preexisting kidney disease with a eGFR < 30ml/min/m<sup>2</sup>. The institutional review board approved this amendment on July 24th 2017. The amendment was applied on August 18th 2017.

| <b>eTable 2: Additional inclusion criteria for dialysis initiation</b> |                                                 |                                                 |                |                                     |
|------------------------------------------------------------------------|-------------------------------------------------|-------------------------------------------------|----------------|-------------------------------------|
|                                                                        | <b>Regional citrate anticoagulation (n=300)</b> | <b>Systemic heparin anticoagulation (n=296)</b> | <b>p-value</b> | <b>Absolute difference [95% CI]</b> |
| Severe sepsis/ septic shock, No./No. total (%)                         | 165/293 (56.3)                                  | 159/284 (56.0)                                  | 0.94           | 0.3 (-7.8, 8.4) <sup>a</sup>        |
| High doses of vasopressors, No./No. total (%) <sup>b</sup>             | 221/299 (73.9)                                  | 215/296 (72.6)                                  | 0.73           | 1.3 (-5.8, 8.4) <sup>a</sup>        |
| Fluid overload or worsening pulmonary edema, No./No. total (%)         | 189/290 (65.2)                                  | 198/289 (68.5)                                  | 0.39           | -3.3 (-11.0, 4.3) <sup>a</sup>      |
| Number of additional inclusion Criteria, No. (%)                       |                                                 |                                                 | 0.79           |                                     |
| 1                                                                      | 98 (32.7)                                       | 98 (33.1)                                       |                |                                     |
| 2                                                                      | 129 (43.0)                                      | 120 (40.5)                                      |                |                                     |
| 3                                                                      | 73 (24.3)                                       | 78 (26.4)                                       |                |                                     |

<sup>a</sup> Absolute difference in percentages

<sup>b</sup> defined as norepinephrine or epinephrine  $\geq 0.1 \mu\text{g}/\text{kg}/\text{min}$  or norepinephrine  $\geq 0.05 \mu\text{g}/\text{kg}/\text{min}$  + dobutamine (any dose) or norepinephrine  $\geq 0.05 \mu\text{g}/\text{kg}/\text{min}$  + vasopressin (any dose) or epinephrine + norepinephrine  $\geq 0.1 \mu\text{g}/\text{kg}/\text{min}$

p-values should be interpreted descriptive, not in terms of statistical testing

| <b>eTable 3: Characteristics of kidney replacement therapy</b>                  |                                                     |                                                     |                |                                         |
|---------------------------------------------------------------------------------|-----------------------------------------------------|-----------------------------------------------------|----------------|-----------------------------------------|
|                                                                                 | <b>Regional citrate anticoagulation<br/>(n=300)</b> | <b>Systemic heparin anticoagulation<br/>(n=296)</b> | <b>p-value</b> | <b>Absolute difference<br/>[95% CI]</b> |
| Filters                                                                         | 965                                                 | 1104                                                |                |                                         |
| Reason for filter change, No./Total No. filters with non-missing data (%)       |                                                     |                                                     |                |                                         |
| Change after 72h (as recommended by the manufacturers)                          | 297/839 (35.4)                                      | 167/999 (16.7)                                      | <0.001         | 18.7 (14.7, 22.7) <sup>a</sup>          |
| Clotting                                                                        | 265/839 (31.6)                                      | 566/999 (56.7)                                      | <0.001         | -25.1 (-29.5, -20.7) <sup>a</sup>       |
| Others (e.g., surgery)                                                          | 256/839 (30.5)                                      | 224/999 (22.4)                                      | <0.001         | 8.1 (4.0, 12.1) <sup>a</sup>            |
| Change of anticoagulation                                                       | 21/839 (2.5)                                        | 42/999 (4.2)                                        | 0.046          | -1.7 (-3.3, -0.1) <sup>a</sup>          |
| Effectiveness of anticoagulation therapy, median (IQR)                          | iCa <sup>2+</sup> (mmol/l)<br>0.3 (0.3- 0.3)        | PTT (s)<br>50.0 (42.0- 58.5)                        | n/a            | n/a                                     |
| Filtration fraction, median (IQR), %                                            | 16.8 (15.2-19.3)                                    | 15.6 (13.3-17.6)                                    | <0.001         | 1.8 (0.8, 2.9) <sup>b</sup>             |
| CKRT dose (delivered), mean (SD), ml/kg/h <sup>c</sup>                          | 27.0 (6.3)                                          | 25.6 (6.2)                                          | <0.001         | 1.4 (0.9, 2.0)                          |
| Modality of CKRT <sup>d</sup> , No./Total No. filters with non-missing data (%) |                                                     |                                                     |                |                                         |
| CVVHD                                                                           | 512/965 (53.1)                                      | 366/1104 (33.2)                                     | <0.001         | 19.9 (15.7, 24.1) <sup>a</sup>          |
| CVVHDF                                                                          | 402/965 (41.7)                                      | 613/1104 (55.5)                                     | <0.001         | -13.9 (-18.1, -9.6) <sup>a</sup>        |
| Pre-dilution                                                                    | 149/388 (38.4)                                      | 191/550 (34.7)                                      | 0.249          | 3.7 (-2.6, 9.9) <sup>a</sup>            |
| Post-dilution                                                                   | 239/388 (61.6)                                      | 359/550 (65.3)                                      | 0.249          | -3.7 (-9.9, 2.6) <sup>a</sup>           |
| CVVH                                                                            | 51/965 (5.3)                                        | 125/1104 (11.3)                                     | <0.001         | -6.0 (-8.4, -3.7) <sup>a</sup>          |
| Blood flow, median (IQR), ml/h                                                  | 10.0 (100.0- 120.0)                                 | 110.0 (105.5- 144.2)                                | <0.001         | -8.0 (-10.0, -2.2) <sup>b</sup>         |
| Dialysate flow, mean (SD), ml/h                                                 | 1593.1 (754.9)                                      | 1603.2 (792.5)                                      | 0.87           | -10.08 (-135.8, 115.6)                  |
| Total replacement flow, median (IQR), ml/h                                      | 1367.2 (1221.5- 1591.7)                             | 1150.0 (900.0- 1329.2)                              | <0.001         | 253.7 (171.3, 346.7) <sup>b</sup>       |
| CVVHD                                                                           | –                                                   | –                                                   | –              | –                                       |

|                                                     |                        |                        |        |                                    |
|-----------------------------------------------------|------------------------|------------------------|--------|------------------------------------|
| CVVHDF                                              | 1357.3 (1222.0-1562.3) | 1171.6 (975.3-1333.3)  | <0.001 | 224.6 (142.0, 307.3) <sup>b</sup>  |
| Pre-dilution                                        | 1460.0 (235.0-2125.3)  | 791.7 (238.0-1350.0)   | 0.449  | 201.2 (-322.1, 800.0) <sup>b</sup> |
| Post-dilution                                       | 1356.3 (1283.0-1477.1) | 1200.0 (1050.0-1329.2) | <0.001 | 187.0 (128.1, 245.7) <sup>b</sup>  |
| CVVH                                                | –                      | –                      | –      | –                                  |
| Calcium substitution, No. (%)                       |                        |                        |        |                                    |
| Calcium chloride                                    | 251 (83.6)             | 50 (16.9)              | <0.001 | 66.8 (60.8, 72.8) <sup>a</sup>     |
| No substitution                                     | 26 (8.7)               | 237 (80.1)             | <0.001 | -71.4 (-77.0, -65.9) <sup>a</sup>  |
| Calcium gluconate                                   | 23 (7.7)               | 9 (3.0)                | 0.012  | 4.6 (1.0, 8.2) <sup>a</sup>        |
| Citrate product <sup>c</sup> , No. (%)              |                        |                        |        |                                    |
| Prismocitrate 18/0                                  | 125 (41.7)             | 17 (5.7)               | <0.001 | 35.9 (29.8, 42.1) <sup>a</sup>     |
| Sodium Citrate 4 %                                  | 111 (37.0)             | 33 (11.1)              | <0.001 | 25.9 (19.3, 32.4) <sup>a</sup>     |
| Citrate K2                                          | 35 (11.7)              | 6 (2.0)                | <0.001 | 9.6 (5.7, 13.6) <sup>a</sup>       |
| 30 % Citrate                                        | 31 (10.3)              | 8 (2.7)                | <0.001 | 7.6 (3.7, 11.5) <sup>a</sup>       |
| Citrate K4                                          | 7 (2.3)                | 0                      | 0.008  | 2.3 (0.6, 4.0) <sup>a</sup>        |
| Prismocitrate 10/2                                  | 2 (0.7)                | 0                      | 0.159  | 0.7 (-0.3, 1.6) <sup>a</sup>       |
| Time on CKRT, median (IQR) days <sup>f</sup>        | 5.9 (3.2- 11.1)        | 5.7 (3.1- 10.6)        | 0.58   | 0.2 (-0.6, 0.9)                    |
| Change to intermittent technique, No./No. total (%) | 60/294 (20.4)          | 54/292 (18.5)          | 0.56   | 1.9 (-4.5, 8.3) <sup>a</sup>       |

<sup>a</sup> Absolute difference in percentages

<sup>b</sup> Hodges-Lehmann estimator of location shift

<sup>c</sup> CKRT dose per filter

<sup>d</sup> modality of CKRT using machine-centric terminology

<sup>e</sup> all percentages refer to randomized patients in respective groups, patients may have received more than one product.

<sup>f</sup> censored at day of death or end of follow-up

p-values should be interpreted descriptive, not in terms of statistical testing

| <b>eTable 4: Characteristics of the catheters used for kidney replacement therapy</b> |                                                     |                                                     |                |
|---------------------------------------------------------------------------------------|-----------------------------------------------------|-----------------------------------------------------|----------------|
|                                                                                       | <b>Regional citrate anticoagulation<br/>(n=300)</b> | <b>Systemic heparin anticoagulation<br/>(n=296)</b> | <b>p-value</b> |
| Catheters <sup>a</sup> , No.                                                          | 447                                                 | 430                                                 |                |
| Catheter per patient, Median (IQR)                                                    | 1.0 (1.0- 2.0)                                      | 1.0 (1.0- 2.0)                                      | 0.50           |
| Catheter diameter, No./No. total (%)                                                  |                                                     |                                                     | 0.14           |
| 11                                                                                    | 10/438 (2.3)                                        | 7/411 (1.7)                                         |                |
| 11.5                                                                                  | 3/438 (0.7)                                         | 11/411 (2.7)                                        |                |
| 12                                                                                    | 112/438 (25.6)                                      | 99/411 (24.1)                                       |                |
| 13                                                                                    | 282/438 (64.4)                                      | 256/411 (62.3)                                      |                |
| 13.5                                                                                  | 31/438 (7.1)                                        | 38/411 (9.2)                                        |                |
| Catheter localization, No./No. total (%)                                              |                                                     |                                                     | 0.79           |
| V. jugularis                                                                          | 278/443 (62.8)                                      | 269/417 (64.5)                                      |                |
| V. subclavia                                                                          | 41/443 (9.3)                                        | 40/417 (9.6)                                        |                |
| V. femoralis                                                                          | 124/443 (28.0)                                      | 108/417 (25.9)                                      |                |
| Type of catheters, No./No. total (%)                                                  |                                                     |                                                     | 0.63           |
| 2-lumen                                                                               | 169/427 (39.6)                                      | 164/398 (41.2)                                      |                |
| 3-lumen                                                                               | 258/427 (60.4)                                      | 234/398 (58.8)                                      |                |
| Catheter length, No./No. total (%)                                                    |                                                     |                                                     | 0.94           |
| 150 mm                                                                                | 116/411 (28.2)                                      | 119/376 (31.6)                                      |                |
| 160 mm                                                                                | 12/411 (2.9)                                        | 11/376 (2.9)                                        |                |
| 175 mm                                                                                | 36/411 (8.8)                                        | 34/376 (9.0)                                        |                |
| 200 mm                                                                                | 163/411 (39.7)                                      | 141/376 (37.5)                                      |                |
| 240 mm                                                                                | 51/411 (12.4)                                       | 44/376 (11.7)                                       |                |
| 250 mm                                                                                | 33/411 (8.0)                                        | 27/376 (7.2)                                        |                |

<sup>a</sup> All catheters were neither tunneled nor coated with antibiotics.

p-values should be interpreted descriptive, not in terms of statistical testing



| <b>eTable 5: Fluid balance at different days</b> |                                                 |                                                 |                |                                       |
|--------------------------------------------------|-------------------------------------------------|-------------------------------------------------|----------------|---------------------------------------|
|                                                  | <b>Regional citrate anticoagulation (n=300)</b> | <b>Systemic heparin anticoagulation (n=296)</b> | <b>p-value</b> | <b>Absolute difference [95% CI]</b>   |
| <b>Secondary outcomes, Median (IQR)</b>          |                                                 |                                                 |                |                                       |
| Fluid balance at day 0, ml                       | 632.0 (-262.0-1720.0)                           | 759.0 (-210.0-2350.0)                           | 0.19           | -218.0 (-544.0, 108.0) <sup>a</sup>   |
| Fluid balance at day 1, ml                       | 144.0 (-924.0-1857.0)                           | 480.0 (-786.0-1845.0)                           | 0.31           | -195.0 (-558.0, 187.0) <sup>a</sup>   |
| Fluid balance at day 2, ml                       | -244.5 (-1287.5-1015.0)                         | 200.0 (-939.0-1509.0)                           | 0.019          | -396.0 (-731.0, -63.0) <sup>a</sup>   |
| Fluid balance at day 3, ml                       | -294.0 (-1200.0-789.0)                          | -107.0 (-1346.0-1001.0)                         | 0.34           | -163.0 (-486.0, 171.0) <sup>a</sup>   |
| Fluid balance at day 4, ml                       | -356.0 (-1560.0-564.0)                          | -228.0 (-1000.0-995.0)                          | 0.020          | -355.0 (-669.0, -53.0) <sup>a</sup>   |
| Fluid balance at day 5, ml                       | -396.0 (-1540.0-422.0)                          | -262.0 (-1406.0-757.0)                          | 0.29           | -169.0 (-486.0, 149.0) <sup>a</sup>   |
| Fluid balance at day 6, ml                       | -203.0 (-1247.0-789.0)                          | -304.0 (-1285.0-927.0)                          | 0.94           | 11.0 (-299.0, 320.0) <sup>a</sup>     |
| Fluid balance at day 7, ml                       | 13.0 (-1056.0-740.0)                            | -387.0 (-1290.0-701.0)                          | 0.16           | 238.0 (-100.0, 564.0) <sup>a</sup>    |
| Cumulative fluid balance at days 0 to 2, ml      | 533.0 (-2290.0-4812.0)                          | 1195.0 (-1918.0-5103.0)                         | 0.33           | -470.0 (-1382.0, 442.0) <sup>a</sup>  |
| Cumulative fluid balance at days 0 to 7, ml      | -301.0 (-4879.5,-3878.0)                        | -229.0 (-5135.0-4775.0)                         | 0.79           | -197.5 (-1864.0, 1457.0) <sup>a</sup> |

<sup>a</sup> Hodges-Lehmann estimator of location shift

p-values should be interpreted descriptive, not in terms of statistical testing

| <b>eTable 6: Further dialysis and kidney associated outcomes</b>                    |                                                 |                                                 |                                     |                          |                |
|-------------------------------------------------------------------------------------|-------------------------------------------------|-------------------------------------------------|-------------------------------------|--------------------------|----------------|
|                                                                                     | <b>Regional citrate anticoagulation (n=300)</b> | <b>Systemic heparin anticoagulation (n=296)</b> | <b>Absolute difference [95% CI]</b> | <b>OR or HR [95% CI]</b> | <b>p-value</b> |
| <b><i>Outcomes at day 28</i></b>                                                    |                                                 |                                                 |                                     |                          |                |
| KRT free days through day 28, median (IQR), days <sup>a</sup>                       | 22.0 (15.0-25.0)                                | 23.0 (13.0-25.0)                                | -1.0 (-2.0, 1.0)                    | HR: 1.04 (0.84, 1.29)    | 0.70           |
| Requirement of RRT on day 28, No./Total No. patients alive at day 28 (%)            | 60/176 (34.1) <sup>b</sup>                      | 50/160 (31.3) <sup>c</sup>                      | 2.8 (-7.2, 12.9) <sup>d</sup>       | OR: 1.14 (0.72, 1.80)    | 0.58           |
| Persistent kidney dysfunction on day 28, No./Total No. patients alive at day 28 (%) | 19/71 (26.8) <sup>e</sup>                       | 21/61 (34.4) <sup>f</sup>                       | -7.7 (-23.4, 8.1) <sup>d</sup>      | OR: 0.70 (0.33, 1.47)    | 0.34           |
| Major adverse kidney events on day 28, No./Total No. patients at risk (%)           | 182/207 (87.9) <sup>g</sup>                     | 187/203 (92.1) <sup>h</sup>                     | -4.2 (-10.0, 1.6) <sup>d</sup>      | OR: 0.62 (0.32, 1.21)    | 0.16           |
| <b><i>Outcomes at day 60</i></b>                                                    |                                                 |                                                 |                                     |                          |                |
| Requirement of RRT on day 60, No./Total No. patients alive at day 60 (%)            | 33/154 (21.4) <sup>i</sup>                      | 28/140 (20.0) <sup>j</sup>                      | 1.4 (-7.8, 10.7) <sup>d</sup>       | OR: 1.09 (0.62, 1.92)    | 0.76           |
| Persistent kidney dysfunction on day 60, No./Total No. patients alive at day 60 (%) | 15/41 (36.6) <sup>k</sup>                       | 9/40 (22.5) <sup>l</sup>                        | 14.1 (-5.5, 33.7) <sup>d</sup>      | OR: 1.99 (0.75, 5.28)    | 0.17           |
| Major adverse kidney events on day 60, No./Total No. patients at risk (%)           | 175/197 (88.8) <sup>m</sup>                     | 178/205 (86.8) <sup>n</sup>                     | 2.0 (-4.4, 8.4) <sup>d</sup>        | OR: 1.21 (0.66, 2.20)    | 0.54           |
| <b><i>Outcomes at day 90</i></b>                                                    |                                                 |                                                 |                                     |                          |                |
| Requirement of RRT on day 90, No./Total No. patients alive at day 90 (%)            | 22/138 (15.9) <sup>o</sup>                      | 18/131 (13.7) <sup>p</sup>                      | 2.2 (-6.3, 10.7) <sup>d</sup>       | OR: 1.19 (0.61, 2.34)    | 0.61           |
| Persistent kidney dysfunction on day 90, No./Total.                                 | 27/95 (28.4) <sup>q</sup>                       | 15/100 (15.0) <sup>r</sup>                      | 13.4 (2.0, 24.9) <sup>d</sup>       | OR: 2.25 (1.11, 4.56)    | 0.023          |

|                                                                                                     |                              |                              |                                 |                       |       |
|-----------------------------------------------------------------------------------------------------|------------------------------|------------------------------|---------------------------------|-----------------------|-------|
| No. patients alive at day 90 (%)                                                                    |                              |                              |                                 |                       |       |
| Major adverse kidney events on day 90, No./Total No. patients at risk (%)                           | 186/246 (75.6) <sup>s</sup>  | 181/258 (70.2) <sup>t</sup>  | 5.5 (-2.3, 13.2) <sup>d</sup>   | OR: 1.32 (0.89, 1.96) | 0.17  |
| New onset of CKD at day 90, No./Total No. patients without CKD at Baseline and alive at day 90 (%)  | 39/64 (60.9) <sup>u</sup>    | 21/52 (40.4) <sup>v</sup>    | 20.6 (2.6, 38.5) <sup>d</sup>   | OR: 2.30 (1.09, 4.86) | 0.028 |
| <b>Outcomes at year 1</b>                                                                           |                              |                              |                                 |                       |       |
| Requirement of RRT on year 1, No./Total No. patients alive at 1 year (%)                            | 8/87 (9.2) <sup>w</sup>      | 7/88 (8.0) <sup>x</sup>      | 1.2 (-7.1, 9.5) <sup>d</sup>    | OR: 1.17 (0.41, 3.38) | 0.77  |
| Persistent kidney dysfunction on year 1, No./Total No. patients alive at year 1 (%)                 | 11/44 (25.0) <sup>y</sup>    | 8/44 (18.2) <sup>z</sup>     | 6.8 (-10.3, 24.0) <sup>d</sup>  | OR: 1.50 (0.54, 4.18) | 0.44  |
| Major adverse kidney events at 1 year, No./Total No. patients at risk (%)                           | 196/228 (86.0) <sup>aa</sup> | 189/223 (84.8) <sup>ab</sup> | 1.2 (-5.3, 7.7) <sup>d</sup>    | OR: 1.10 (0.65, 1.86) | 0.72  |
| CKD at 1 year, No./Total No. patients alive at 1 year (%)                                           | 27/44 (61.4) <sup>ac</sup>   | 28/44 (63.6) <sup>ad</sup>   | -2.3 (-22.5, 18.0) <sup>d</sup> | OR: 0.91 (0.38, 2.15) | 0.83  |
| New onset of CKD at 1 year, No./ Total No. patients without CKD at Baseline and alive at 1 year (%) | 20/30 (66.7) <sup>ae</sup>   | 13/23 (56.5) <sup>af</sup>   | 10.1 (-16.2, 36.5) <sup>d</sup> | OR: 1.54 (0.50, 4.72) | 0.45  |

Abbreviations: CKD, chronic kidney disease; KRT, kidney replacement therapy; OR, odds ratio.

Major adverse kidney events is a combined endpoint consisting of persistent kidney dysfunction, kidney replacement therapy and mortality.

<sup>a</sup> censored at the day of death or end of follow-up according whatever occurred first

<sup>b</sup> 178 patients were alive at day 28. Two patients were excluded from the calculation of percentage, as no RRT was started

<sup>c</sup> 162 patients were alive at day 28. Two patients were excluded from the calculation of percentage, as no RRT was started

<sup>d</sup> Absolute difference in percentages

<sup>e</sup> 107 patients were excluded from the calculation of percentage, as data on PKD was missing.

<sup>f</sup> 101 patients were excluded from the calculation of percentage, as data on PKD was missing.

<sup>g</sup> 93 patients were excluded from the calculation of percentage due to missing data.

<sup>h</sup> 93 patients were excluded from the calculation of percentage due to missing data.

<sup>i</sup> 155 patients were alive at day 60. One patient was excluded from the calculation of percentage, as no RRT was started.

<sup>j</sup> 142 patients were alive at day 60. Two patients were excluded from the calculation of percentage, as no RRT was started.

<sup>k</sup> 114 patients were excluded from the calculation of percentage, as data on PKD was missing.

<sup>l</sup> 102 patients were excluded from the calculation of percentage, as data on PKD was missing.

<sup>m</sup> 103 patients were excluded from the calculation of percentage due to missing data.

<sup>n</sup> 91 patients were excluded from the calculation of percentage due to missing data.

<sup>o</sup> 139 patients were alive at day 90. One patient was excluded from the calculation of percentage, as no RRT was started.

<sup>p</sup> 132 patients were alive at day 90. One patient was excluded from the calculation of percentage, as no RRT was started.

<sup>q</sup> 44 patients were excluded from the calculation of percentage, as data on PKD was missing.

- <sup>r</sup> 32 patients were excluded from the calculation of percentage, as data on PKD was missing.
- <sup>s</sup> 54 patients were excluded from the calculation of percentage due to missing data.
- <sup>t</sup> 38 patients were excluded from the calculation of percentage due to missing data.
- <sup>u</sup> 23 patients were excluded from the calculation of percentage due to missing data.
- <sup>v</sup> 20 patients were excluded from the calculation of percentage due to missing data.
- <sup>w</sup> 88 patients were alive at day 365. One patient was excluded from the calculation of percentage, as no RRT was started.
- <sup>x</sup> 89 patients were alive at day 365. One patient was excluded from the calculation of percentage, as no RRT was started.
- <sup>y</sup> 44 patients were excluded from the calculation of percentage, as data on PKD was missing.
- <sup>z</sup> 45 patients were excluded from the calculation of percentage, as data on PKD was missing.
- <sup>aa</sup> 72 patients were excluded from the calculation of percentage due to missing data.
- <sup>ab</sup> 73 patients were excluded from the calculation of percentage due to missing data.
- <sup>ac</sup> 88 patients were alive at day 365. 44 patients were excluded from the calculation of percentage, as data on CKD was missing.
- <sup>ad</sup> 89 patients were alive at day 365. 45 patients were excluded from the calculation of percentage, as data on CKD was missing.
- <sup>ae</sup> 23 patients were excluded from the calculation of percentage due to missing data.
- <sup>af</sup> 25 patients were excluded from the calculation of percentage due to missing data.

| <b>eTable 7: Details on Infections</b>                   |                                                 |                                                 |                                     |                          |                |
|----------------------------------------------------------|-------------------------------------------------|-------------------------------------------------|-------------------------------------|--------------------------|----------------|
|                                                          | <b>Regional citrate anticoagulation (n=300)</b> | <b>Systemic heparin anticoagulation (n=296)</b> | <b>Absolute difference [95% CI]</b> | <b>OR or HR [95% CI]</b> | <b>p-value</b> |
| New infection since start of dialysis, No./Total No. (%) | 204/300 (68.0)                                  | 164/296 (55.4)                                  | 12.6 (4.9, 20.3) <sup>a</sup>       | OR: 1.71 (1.23, 2.39)    | 0.002          |
| <b>Pathogen, No./Total No. (%)</b>                       |                                                 |                                                 |                                     |                          |                |
| Gram positive                                            | 123/300 (41.0)                                  | 97/296 (32.8)                                   | 8.2 (0.5, 16.0) <sup>a</sup>        | OR: 1.43 (1.02, 1.99)    | 0.037          |
| Gram negative                                            | 105/300 (35.0)                                  | 88/296 (29.7)                                   | 5.3 (-2.2, 12.8) <sup>a</sup>       | OR: 1.27 (0.90, 1.80)    | 0.17           |
| Gram positive and negative                               | 38/300 (12.7)                                   | 33/296 (11.1)                                   | 1.5 (-3.7, 6.7) <sup>a</sup>        | OR: 1.16 (0.70, 1.90)    | 0.57           |
| Multi resistant                                          | 37/300 (12.3)                                   | 21/296 (7.1)                                    | 5.2 (0.5, 10.0) <sup>a</sup>        | OR: 1.84 (1.05, 3.23)    | 0.031          |
| Fungal infection                                         | 112/300 (37.3)                                  | 100/296 (33.8)                                  | 3.6 (-4.1, 11.2) <sup>a</sup>       | OR: 1.17 (0.83, 1.63)    | 0.37           |
| <b>Source of infection, No./Total No. (%)</b>            |                                                 |                                                 |                                     |                          |                |
| Bacteremia                                               | 57/204 (27.9)                                   | 49/164 (29.9)                                   | -1.9 (-11.3, 7.4) <sup>a</sup>      | OR: 0.91 (0.58, 1.43)    | 0.68           |
| Pneumonia                                                | 82/204 (40.2)                                   | 71/164 (43.3)                                   | -3.1 (-13.2, 7.0) <sup>a</sup>      | OR: 0.88 (0.58, 1.34)    | 0.55           |
| UTI                                                      | 25/204 (12.3)                                   | 18/164 (11.0)                                   | 1.3 (-5.3, 7.9) <sup>a</sup>        | OR: 1.13 (0.59, 2.16)    | 0.70           |
| Others                                                   | 97/204 (47.5)                                   | 91/164 (55.5)                                   | -7.9 (-18.2, 2.3) <sup>a</sup>      | OR: 0.73 (0.48, 1.10)    | 0.13           |
| Time to infection, median (IQR), days <sup>b</sup>       | 4 (2-10)                                        | 6 (2-14)                                        | -1 (-4, 0)                          | HR: 1.38 (1.12, 1.69)    | 0.001          |

Abbreviation: UTI, urinary tract infection.

<sup>a</sup> Absolute difference in percentages

<sup>b</sup> censored at the day of death or end of follow-up according whatever occurred first

| <b>eTable 8: Subgroup analysis surgical vs. non-surgical patients</b>                |                                                 |                                                 |                |                                                |                                                |                |                                   |
|--------------------------------------------------------------------------------------|-------------------------------------------------|-------------------------------------------------|----------------|------------------------------------------------|------------------------------------------------|----------------|-----------------------------------|
|                                                                                      | <b>Surgical</b>                                 |                                                 |                | <b>Non-Surgical</b>                            |                                                |                |                                   |
|                                                                                      | <b>Regional citrate anticoagulation (n=225)</b> | <b>Systemic heparin anticoagulation (n=228)</b> | <b>p-value</b> | <b>Regional citrate anticoagulation (n=75)</b> | <b>Systemic heparin anticoagulation (n=68)</b> | <b>p-value</b> | <b>p-value (Interaction test)</b> |
| Filter, No.                                                                          | 668                                             | 810                                             |                | 297                                            | 294                                            |                |                                   |
| <b>Primary outcomes</b>                                                              |                                                 |                                                 |                |                                                |                                                |                |                                   |
| Filter lifespan, median (IQR), hours                                                 | 45.0 (18.1- 69.0)                               | 25.5 (11.8- 50.7)                               | <0.001         | 48.2 (20.9- 71.2)                              | 27.2 (13.7- 50.3)                              | <0.001         | 0.683                             |
| 90-day all-cause mortality, No. (%)                                                  | 108 (49.1)                                      | 111 (49.4)                                      | 0.77           | 42 (57.7)                                      | 45 (67.8)                                      | 0.072          | 0.125                             |
| <b>Secondary and other outcomes</b>                                                  |                                                 |                                                 |                |                                                |                                                |                |                                   |
| Duration of kidney replacement therapy, median (IQR), days <sup>a</sup>              | 9.0 (3.5- 60.0)                                 | 7.9 (3.2- 39.0)                                 | 0.23           | 11.9 (5.0- 45.0)                               | 13.8 (4.6- 60.0)                               | 0.84           | 0.650                             |
| Kidney replacement therapy free days through day 28, median (IQR), days <sup>a</sup> | 22.0 (15.0- 25.0)                               | 23.0 (12.0- 25.0)                               | 0.84           | 21.0 (11.0- 24.0)                              | 22.0 (16.0- 24.0)                              | 0.73           | 0.853                             |
| <b>Bleeding and transfusion</b>                                                      |                                                 |                                                 |                |                                                |                                                |                |                                   |
| Bleeding, No. (%)                                                                    | 12 (5.4)                                        | 41 (18.4)                                       | <0.001         | 3 (4.2)                                        | 8 (11.9)                                       | 0.094          | 0.750                             |
| Transfusion requirement (red blood cells), No. (%)                                   | 149 (67.1)                                      | 148 (66.4)                                      | 0.87           | 48 (67.6)                                      | 36 (53.7)                                      | 0.10           | 0.174                             |
| Transfusion volume (red blood cells), median (IQR), ml                               | 300 (0- 1000)                                   | 600 (0- 1200)                                   | 0.29           | 600 (0- 1250)                                  | 250 (0- 1000)                                  | 0.19           | 0.707                             |

|                                                                                                 |                     |                     |       |                    |                   |        |       |
|-------------------------------------------------------------------------------------------------|---------------------|---------------------|-------|--------------------|-------------------|--------|-------|
| <b><i>Infection</i></b>                                                                         |                     |                     |       |                    |                   |        |       |
| New onset of infection, No. (%)                                                                 | 148 (65.8)          | 132 (57.9)          | 0.084 | 56 (74.7)          | 32 (47.1)         | <0.001 | 0.035 |
| <b><i>ICU and Hospital stay</i></b>                                                             |                     |                     |       |                    |                   |        |       |
| ICU length of stay, median (IQR), days                                                          | 14.5 (7.0- 26.5)    | 13.5 (7.0- 26.0)    | 0.69  | 17.0 (8.0- 34.0)   | 13.5 (6.0- 23.0)  | 0.043  | 0.038 |
| ICU length of stay, median (IQR), days <sup>a</sup>                                             | 22.0 (11.0- 42.0)   | 25.0 (12.0- 55.0)   | 0.67  | 33.0 (18.0- 60.0)  | 29.0 (16.0- 35.0) | 0.14   | 0.256 |
| Hospital length of stay, median (IQR), days                                                     | 27.0 (14.0- 51.0)   | 29.5 (15.0- 50.0)   | 0.80  | 25.0 (11.0- 55.0)  | 21.0 (12.5- 42.0) | 0.35   | 0.731 |
| Hospital length of stay, median (IQR), days <sup>a</sup>                                        | 45.0 (27.0- 86.0)   | 55.0 (34.0- 91.0)   | 0.82  | 64.0 (30.0- 112.0) | 52.0 (32.0- 96.0) | 0.84   | 0.883 |
| <b><i>Outcomes at day 28</i></b>                                                                |                     |                     |       |                    |                   |        |       |
| 28-day all-cause mortality, No. (%)                                                             | 84 (38.0)           | 93 (41.2)           | 0.47  | 30 (40.8)          | 35 (52.5)         | 0.16   | 0.398 |
| Requirement of kidney replacement therapy on day 28, No./Total No. patients alive at day 28 (%) | 47/135 (34.8)       | 41/(131-2) (31.8)   | 0.60  | 13/(43-2) (31.7)   | 9/31 (29.0)       | 0.81   | 0.986 |
| Persistent kidney dysfunction on day 28, No./Total No. patients alive at day 28 (%)             | 15/(135-85) (30.0)  | 18/(131-81) (36.0)  | 0.52  | 4/(43-22) (19.0)   | 3/(31-20) (27.3)  | 0.59   | 0.842 |
| Major adverse kidney events on day 28, No./Total No. patients at risk (%)                       | 137/(225-71) (89.0) | 142/(228-74) (92.2) | 0.33  | 45/(75-22) (84.9)  | 45/(68-19) (91.8) | 0.28   | 0.684 |

|                                                                                                  |                     |                     |       |                   |                   |       |       |
|--------------------------------------------------------------------------------------------------|---------------------|---------------------|-------|-------------------|-------------------|-------|-------|
| <b>Outcomes at day 60</b>                                                                        |                     |                     |       |                   |                   |       |       |
| 60-day all cause mortality, No. (%)                                                              | 100 (45.4)          | 108 (48.0)          | 0.52  | 37 (50.6)         | 39 (58.6)         | 0.24  | 0.492 |
| Requirement of kidney replacement therapy on day 60, No./Total No. patients alive at day 60, (%) | 27/120 (22.5)       | 23/(115-2) (20.4)   | 0.69  | 6/(35-1) (17.6)   | 5/27 (18.5)       | 0.93  | 0.802 |
| Persistent kidney dysfunction on day 60, No./Total No. patients alive at day 60 (%)              | 12/(120-86) (35.3)  | 8/(115-79) (22.2)   | 0.23  | 3/(35-28) (42.9)  | 1/(27-23) (25.0)  | 0.55  | 0.912 |
| Major adverse kidney events on day 60, No./Total No. patients at risk (%)                        | 130/(225-75) (86.7) | 134/(228-70) (84.8) | 0.64  | 45/(75-28) (95.7) | 44/(68-21) (93.6) | 0.65  | 0.781 |
| <b>Outcomes at day 90</b>                                                                        |                     |                     |       |                   |                   |       |       |
| Requirement of kidney replacement therapy on day 90, No./Total No. patients alive at day 90 (%)  | 18/110 (16.4)       | 16/(111-1) (14.5)   | 0.71  | 4/(29-1) (14.3)   | 2/21 (9.5)        | 0.62  | 0.747 |
| Persistent kidney dysfunction on day 90, No./Total No. patients alive at day 90 (%)              | 22/(110-30) (27.5)  | 15/(111-22) (16.9)  | 0.095 | 5/(29-14) (33.3)  | 0/(21-10) (0)     | 0.033 | 0.965 |
| Major adverse kidney events on day 90, No./Total No. patients at risk (%)                        | 137/(225-35) (72.1) | 134/(228-27) (66.7) | 0.24  | 49/(75-19) (87.5) | 47/(68-11) (82.5) | 0.45  | 0.806 |



|                                                                                                                                          |                     |                     |       |                   |                   |       |       |
|------------------------------------------------------------------------------------------------------------------------------------------|---------------------|---------------------|-------|-------------------|-------------------|-------|-------|
| New onset of chronic kidney disease at day 90, No./Total No. patients without chronic kidney disease at Baseline and alive at day 90 (%) | 32/(68-16) (61.5)   | 21/(63-15) (43.8)   | 0.075 | 7/(19-7) (58.3)   | 0/(9-5) (0)       | 0.042 | 0.972 |
| <b><i>Outcomes at 1 year</i></b>                                                                                                         |                     |                     |       |                   |                   |       |       |
| 1-year all-cause mortality, No. (%)                                                                                                      | 127 (58.0)          | 127 (56.7)          | 0.96  | 48 (66.5)         | 47 (71.1)         | 0.28  | 0.377 |
| Requirement of kidney replacement therapy on year 1, No./Total No. patients alive at 1 year (%)                                          | 6/66 (9.1)          | 6/(75-1) (8.1)      | 0.84  | 2/(22-1) (9.5)    | 1/14 (7.1)        | 0.81  | 0.894 |
| Persistent kidney dysfunction on year 1, No./Total No. patients alive at year 1 (%)                                                      | 5/(66-29) (13.5)    | 8/(75-35) (20.0)    | 0.45  | 6/(22-15) (85.7)  | 0/(14-10) (0.0)   | 0.006 | 0.958 |
| Major adverse kidney events 1 year, No./Total No. patients at risk (%)                                                                   | 141 (225-53) (82.0) | 141/(228-56) (82.0) | 1.00  | 55/(75-19) (98.2) | 48/(68-17) (94.1) | 0.27  | 0.305 |
| Chronic kidney disease at 1 year, No./Total No. patients alive at 1 year (%)                                                             | 21 (66-29) (56.8)   | 26/(75-35) (65.0)   | 0.46  | 6/(22-15) (85.7)  | 2/(14-10) (50.0)  | 0.20  | 0.166 |

|                                                                                                                                                        |                   |                   |      |                 |             |       |        |
|--------------------------------------------------------------------------------------------------------------------------------------------------------|-------------------|-------------------|------|-----------------|-------------|-------|--------|
| New onset of chronic kidney disease at 1 year, No./ Total No. patients without pre-existing chronic kidney disease at baseline and alive at 1 year (%) | 14/(39-16) (60.9) | 13/(43-21) (59.1) | 0.90 | 6/(14-7) (85.7) | 0/(5-4) (0) | 0.064 | 0.9639 |
|--------------------------------------------------------------------------------------------------------------------------------------------------------|-------------------|-------------------|------|-----------------|-------------|-------|--------|

<sup>a</sup> Censored at patients' date of death or end of follow-up whatever occurred first

| <b>eTable 9: Adverse events in surgical patients</b>     |                                                 |                                                 |
|----------------------------------------------------------|-------------------------------------------------|-------------------------------------------------|
|                                                          | <b>Regional citrate anticoagulation (n=225)</b> | <b>Systemic heparin anticoagulation (n=228)</b> |
| Heparin induced thrombocytopenia, No. (%) <sup>a</sup>   | 7 (3.2)                                         | 5 (2.2)                                         |
| Thrombotic, thromboembolic complications, No. (%)        | 0 (0)                                           | 2 (0.9)                                         |
| Hyperkalemia, No. (%) <sup>b</sup>                       | 0 (0)                                           | 2 (0.9)                                         |
| Severe hypocalcemia, No. (%) <sup>c</sup>                | 3 (1.4)                                         | 1 (0.4)                                         |
| Severe alkalosis, No. (%) <sup>d</sup>                   | 5 (2.3)                                         | 1 (0.4)                                         |
| Metabolic acidosis, No. (%) <sup>e</sup>                 | 1 (0.5)                                         | 2 (0.9)                                         |
| Citrate accumulation, No. (%) <sup>f</sup>               | 2 (0.9)                                         | 0 (0)                                           |
| Hypophosphatemia, No. (%) <sup>g</sup>                   | 42 (18.9)                                       | 16 (7.2)                                        |
| Gastrointestinal complications, No. (%) <sup>h</sup>     | 1 (0.5)                                         | 9 (4.0)                                         |
| Respiratory complications, No. (%) <sup>i</sup>          | 2 (0.9)                                         | 3 (1.3)                                         |
| Neurologic complications, No. (%) <sup>j</sup>           | 3 (1.4)                                         | 2 (0.9)                                         |
| Sever cardiac-rhythm disorders, No. (%)                  | 7 (3.2)                                         | 7 (3.1)                                         |
| Other cardiovascular complications, No. (%) <sup>k</sup> | 1 (0.5)                                         | 4 (1.8)                                         |

<sup>a</sup> positive antibody test

<sup>b</sup> extracted from adverse events terms

<sup>c</sup> ionized calcium <0.9mmol/l

<sup>d</sup> pH > 7.50 and HCO<sub>3</sub><sup>-</sup> > 30mmol/L

<sup>e</sup> pH < 7.2 and HCO<sub>3</sub><sup>-</sup> < 20mmol/L (excluding lactic acidosis)

<sup>f</sup> Ca<sup>2+</sup>total/Ca<sup>2+</sup>ion ≥ 2.5

<sup>g</sup> phosphate < 0.5mmol/l

<sup>h</sup> includes all gastrointestinal bleeding events requiring at least 1 packed red blood cell

<sup>i</sup> includes complications such as pneumonia, acute respiratory distress syndrome, Horowitz index < 200 for at least 1 hour, and respiratory complications with the need of re-intubation/re-cannulation

<sup>j</sup> includes complications such as seizures, delirium and hypoxic brain damage

<sup>k</sup> includes complications such as ischemia, cardiogenic shock, cardiac decompensation

**eTable 10: Adverse events in non-surgical patients**

|                                                          | <b>Regional citrate anticoagulation<br/>(n=75)</b> | <b>Systemic heparin anticoagulation<br/>(n=68)</b> |
|----------------------------------------------------------|----------------------------------------------------|----------------------------------------------------|
| Heparin induced thrombocytopenia, No. (%) <sup>a</sup>   | 1 (1.4)                                            | 4 (6.0)                                            |
| Thrombotic, thromboembolic complications, No. (%)        | 0 (0)                                              | 1 (1.5)                                            |
| Hyperkalemia, No. (%) <sup>b</sup>                       | 0 (0)                                              | 2 (3.0)                                            |
| Severe hypocalcemia, No. (%) <sup>c</sup>                | 1 (1.4)                                            | 0 (0)                                              |
| Severe alkalosis, No. (%) <sup>d</sup>                   | 2 (2.8)                                            | 0 (0)                                              |
| Metabolic acidosis, No. (%) <sup>e</sup>                 | 0 (0)                                              | 0 (0)                                              |
| Citrate accumulation, No. (%) <sup>f</sup>               | 0 (0)                                              | 0 (0)                                              |
| Hypophosphatemia, No. (%) <sup>g</sup>                   | 3 (4.2)                                            | 2 (3.0)                                            |
| Gastrointestinal complications, No. (%) <sup>h</sup>     | 1 (1.4)                                            | 1 (1.5)                                            |
| Respiratory complications, No. (%) <sup>i</sup>          | 1 (1.4)                                            | 3 (4.5)                                            |
| Neurologic complications, No. (%) <sup>j</sup>           | 1 (1.4)                                            | 2 (3.0)                                            |
| Sever cardiac-rhythm disorders, No. (%)                  | 3 (4.2)                                            | 2 (3.0)                                            |
| Other cardiovascular complications, No. (%) <sup>k</sup> | 1 (1.4)                                            | 1 (1.5)                                            |

<sup>a</sup> positive antibody test

<sup>b</sup> extracted from adverse events terms

<sup>c</sup> ionized calcium <0.9mmol/l

<sup>d</sup> pH > 7.50 and HCO<sub>3</sub><sup>-</sup> > 30mmol/L

<sup>e</sup> pH < 7.2 and HCO<sub>3</sub><sup>-</sup> < 20mmol/L (excluding lactic acidosis)

<sup>f</sup> Ca<sup>2+</sup>total/Ca<sup>2+</sup>ion ≥ 2.5

<sup>g</sup> phosphate < 0.5mmol/l

<sup>h</sup> includes all gastrointestinal bleeding events requiring at least 1 packed red blood cell

<sup>i</sup> includes complications such as pneumonia, acute respiratory distress syndrome, Horowitz index < 200 for at least 1 hour, and respiratory complications with the need of re-intubation/re-cannulation

<sup>j</sup> includes complications such as seizures, delirium and hypoxic brain damage

<sup>k</sup> includes complications such as ischemia, cardiogenic shock, cardiac decompensation

## Supplementary References

1. Pocock SJ, Simon R. Sequential treatment assignment with balancing for prognostic factors in the controlled clinical trial. *Biometrics* 1975;31:103-15.
2. Morgera S, Schneider M, Slowinski T, et al. A safe citrate anticoagulation protocol with variable treatment efficacy and excellent control of the acid-base status. *Crit Care Med* 2009;37:2018-24.
3. Klingele M, Seiler S, Poppleton A, Lepper P, Fliser D, Seidel R. The gap between calculated and actual calcium substitution during citrate anticoagulation in an immobilised patient on renal replacement therapy reflects the extent of bone loss - a case report. *BMC Nephrol* 2014;15.
4. Guyatt GH, Akl EA, Crowther M, Schunemann HJ, Gutterman DD, Lewis SZ. Introduction to the Ninth Edition Antithrombotic Therapy and Prevention of Thrombosis, 9th ed: American College of Chest Physicians Evidence-Based Clinical Practice Guidelines. *Chest* 2012;141:48s-52s.
5. Levey AS, Stevens LA, Schmid CH, et al. A new equation to estimate glomerular filtration rate. *Ann Intern Med* 2009;150:604-12.
