# Supplementary material
Source: PubMed Central journal article supplement (PMC7585036)
Supplement: jama-e2018618-s004.pdf [file jama-e2018618-s004.pdf]

## Supplementary Online Content 4

Zarbock A, Küllmar M, Kindgen-Milles D, et al; RICH Investigators and the Sepnet Trial Group. Effect of regional citrate anticoagulation vs systemic heparin anticoagulation during continuous kidney replacement therapy on dialysis filter life span and mortality among critically ill patients with acute kidney injury: a randomized clinical trial. *JAMA*. doi:10.1001/jama.2020.18618

### Data Sharing Statement

Data

Data available: Yes.

Data types: Deidentified participant data.

How to access data: [zarbock@uni-muenster.de](mailto:zarbock@uni-muenster.de)

When available: With publication

### Supporting Documents

Document types: None

### Additional Information

Who can access the data: Researchers whose proposed use of the data has been approved

Types of analyses: Any purpose

Mechanisms of data availability: With investigator support, after approval of proposal with a signed data access agreement
